# Supplementary material
Source: Royal Society of Chemistry journal article supplement (doi:10.1039/d6ce00160b)
Supplement: d6ce00160b1.pdf [file d6ce00160b1.pdf]

## SUPPLEMENTARY INFORMATION

### **The host potential of *N,N'*-bis(9-(4-methoxyphenyl)-9*H*-xanthen-9-yl)ethane-1,2-diamine for the xylene and ethylbenzene isomers, and its selectivity behaviour in mixed guest solutions**

**Benita Barton,\* Muhammad-Ameen Adam and Eric C. Hosten**

*Department of Chemistry, Nelson Mandela University, PO Box 77000, Gqeberha (Port Elizabeth), 6031, South Africa.*

*Email: [benita.barton@mandela.ac.za](mailto:benita.barton@mandela.ac.za)*

a)

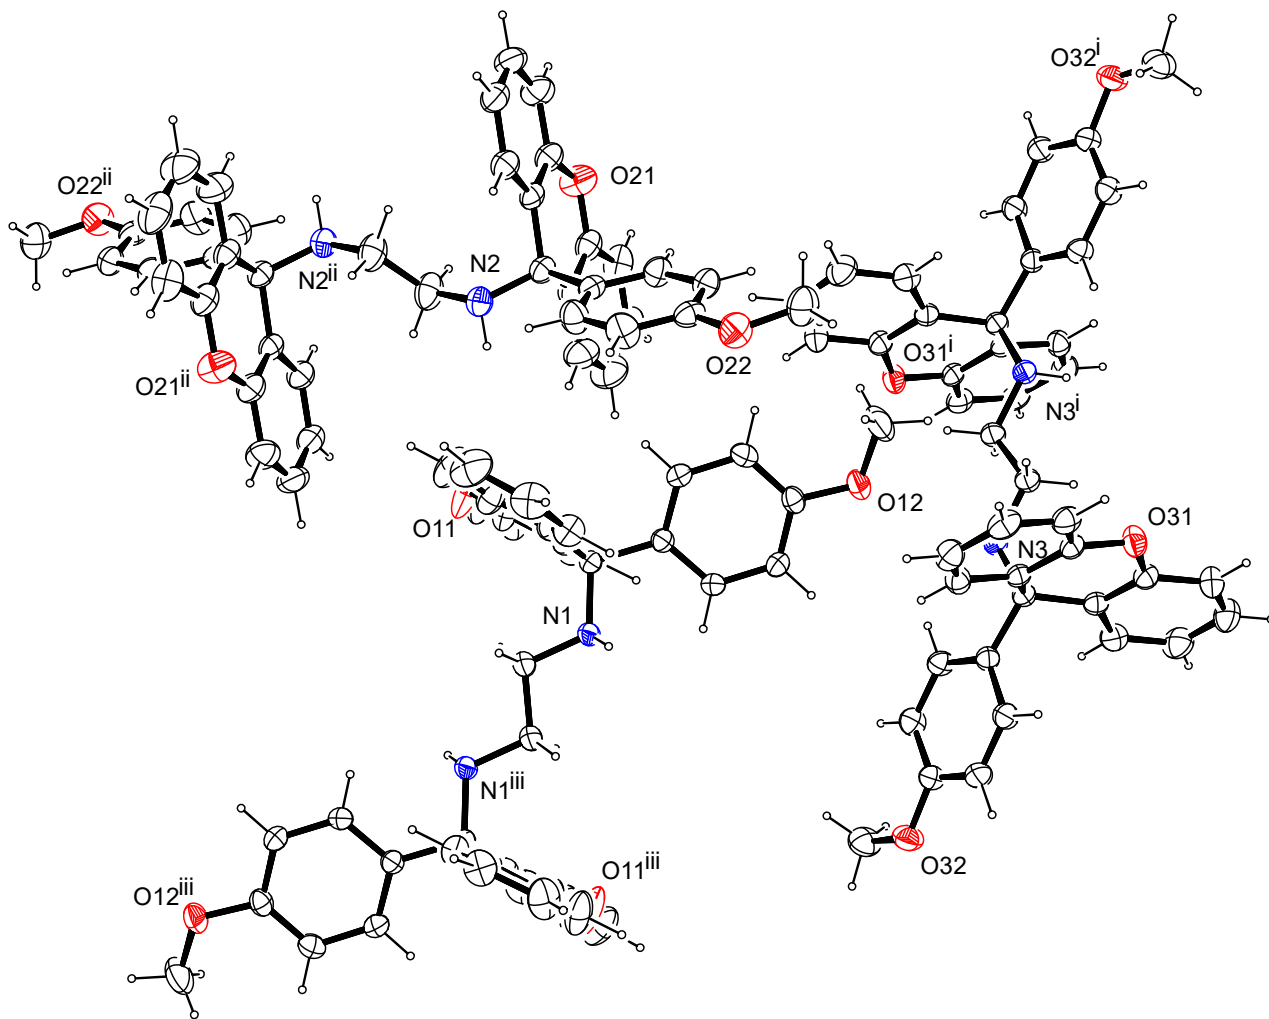

b)

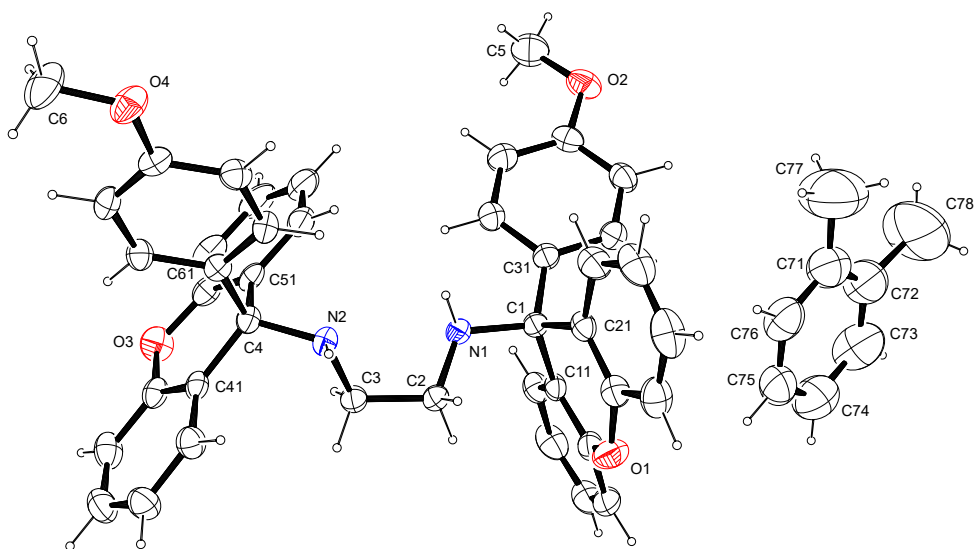

c)

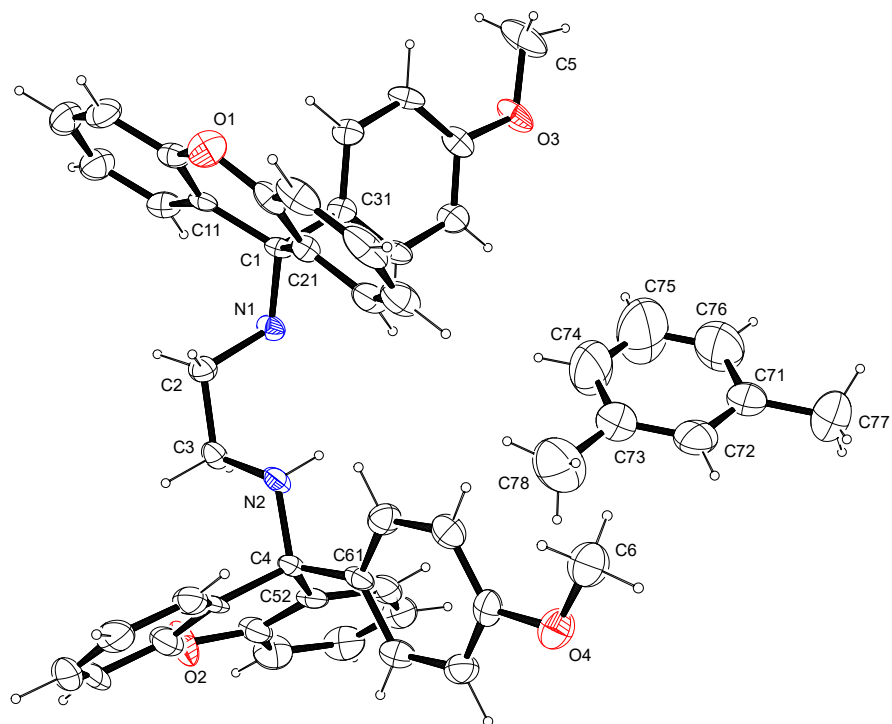

d)

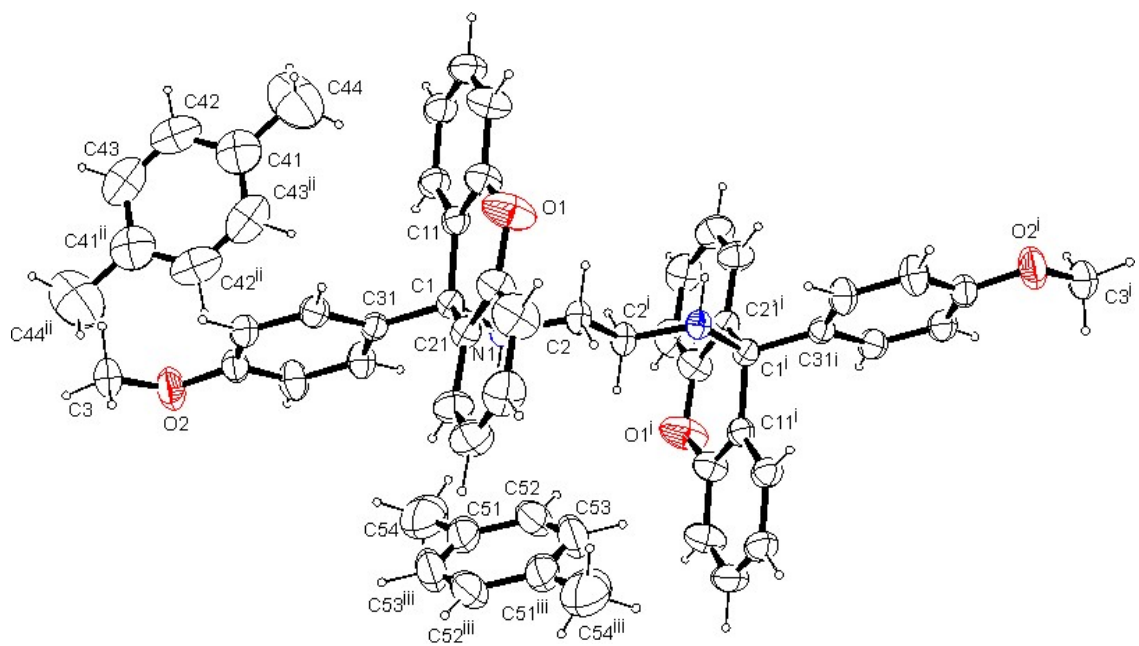

Figure S1 ORTEP diagrams for a) guest-free H, b) H-o-Xy, c) H-m-Xy and d) H-2(p-Xy).

a)

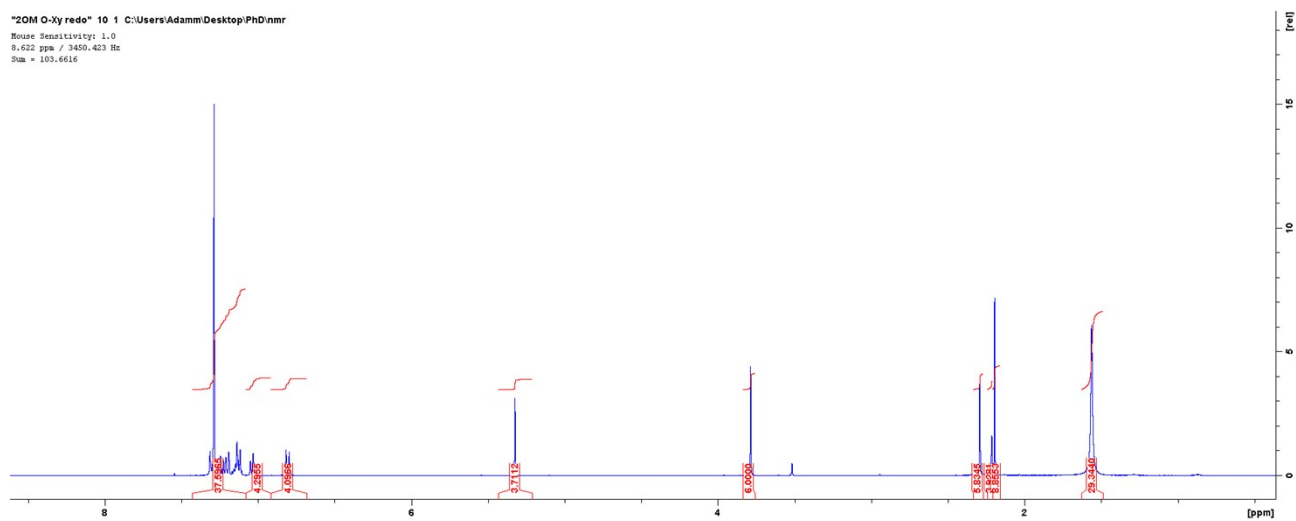

b)

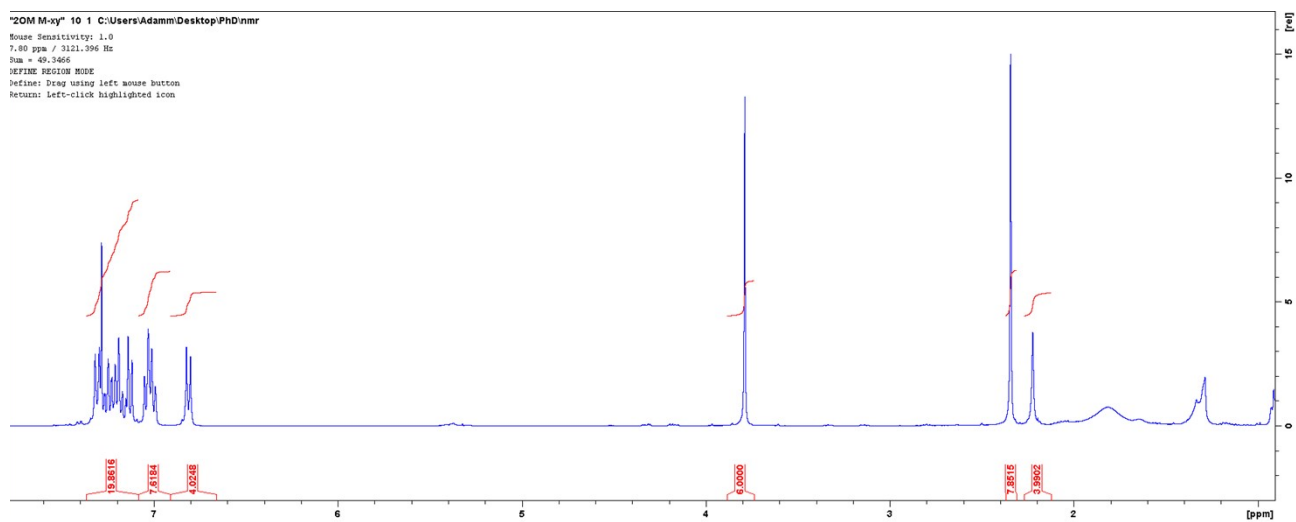

c)

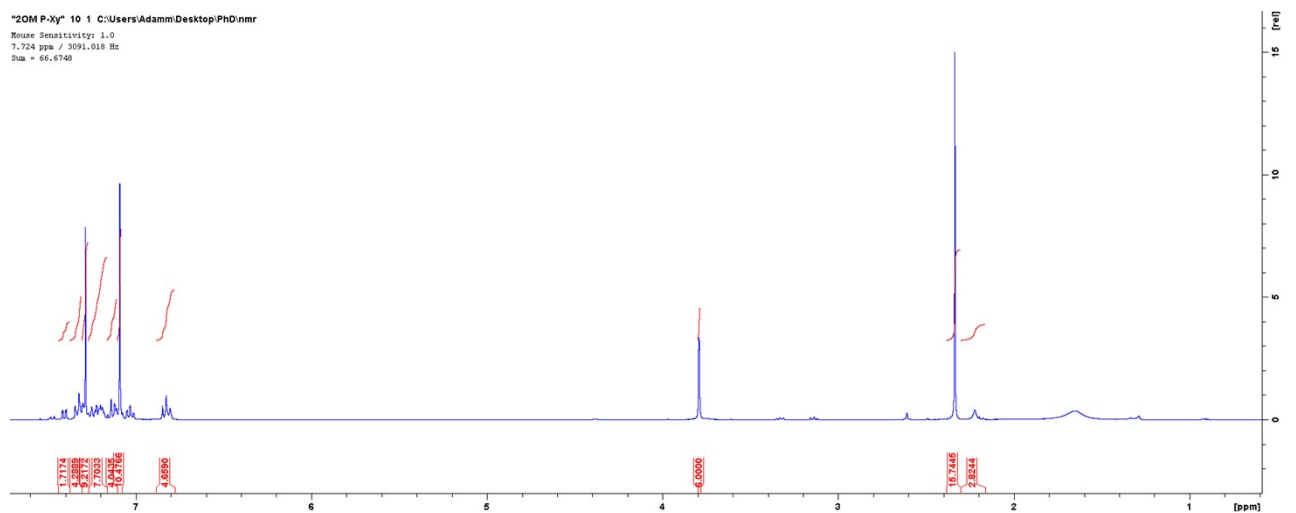

Figure S2 Proton NMR spectra for the a) *o*-Xy, b) *m*-Xy and c) *p*-Xy complexes of H.
